# Supplementary material for: Perfluorocarbon liquid under pressure: a medium for gas delivery
Source: Royal Society of Chemistry journal article supplement (doi:10.1039/c5ce01989c), 2015-12-14
Supplement: c5ce01989c1.pdf [file c5ce01989c1.pdf]

Supplementary Information for

## **Perfluorocarbon Liquid Under Pressure: A Medium for Gas Delivery**

Scott C. McKellar<sup>1</sup>, Jorge Sotelo<sup>1</sup>, John P. S. Mowat<sup>2</sup>, Paul A. Wright<sup>2</sup> and Stephen A. Moggach\*<sup>1</sup>

<sup>1</sup>EaStCHEM School of Chemistry and the Centre for Science at Extreme Conditions, University of Edinburgh, Kings Buildings, West Mains Road, Edinburgh, EH9 3JJ, UK.

<sup>2</sup>EaStCHEM School of Chemistry, University of St Andrews, Purdie Building, St Andrews, KY16 9ST, UK.

\*email: [s.moggach@ed.ac.uk](mailto:s.moggach@ed.ac.uk)

## **S1. Materials**

All starting materials and solvents were purchased from Sigma-Aldrich (UK) in high purity and used as received.  $\text{Sc}_2\text{BDC}_3$  was synthesised using a previously described method.<sup>1</sup>

## **S2. Dissolving $\text{CO}_2$ in FC-77**

5 mL of FC-77 was added to a small glass vial, which was sealed with a rubber cap and connected to a  $\text{CO}_2$  canister via a syringe embedded in rubber tubing. The syringe was positioned directly in the FC-77 enabling the  $\text{CO}_2$  gas to bubble through the solution, saturating the FC-77 with  $\text{CO}_2$ . A second syringe was used to pierce the rubber seal of the beaker containing the FC-77 to act as a pressure outlet.  $\text{CO}_2$  was bubbled through the FC-77 for 1 hour before removing the syringe from the liquid whilst keeping it under a  $\text{CO}_2$  atmosphere.  $\text{CO}_2$  saturation was confirmed by infrared spectroscopy (see section S3 below). The carbonated FC-77 was used immediately for pressure experiments and kept within the sealed syringe to prevent loss of  $\text{CO}_2$ .

## **S3. IR spectroscopy**

IR data were collected on both FC-77 and the  $\text{CO}_2$  enriched sample of FC-77 on a PerkinElmer 65 spectrometer. The samples were placed in a rectangular sealed liquid cell mount holder and data collected from  $1000\text{-}3600\text{cm}^{-1}$ .

## **S4. Single-crystal X-ray diffraction**

### *Data collection, reduction and refinement*

For the ambient-pressure diffraction experiment in a liquid, a crystal of  $\text{Sc}_2\text{BDC}_3$  was stuck to the tip of a MiTeGen  $100\ \mu\text{m}$  Microloop<sup>TM</sup> using a small amount of Araldite<sup>TM</sup> epoxy resin. The loop was mounted on a goniometer head, and covered with a MicroRT<sup>TM</sup> polyester capillary. The capillary was stuck to the goniometer head and sealed around the base using Araldite<sup>TM</sup>. When the epoxy resin was dry, the capillary was filled with  $\text{CO}_2$ -loaded FC-77 by injecting the liquid through the top of the capillary using a  $0.6\ \text{mm}$  needle. The resultant hole was sealed by melting a small amount of beeswax over the hole. Single-crystal X-ray diffraction data were then collected at room temperature on an Agilent SuperNova diffractometer with graphite-monochromated Mo  $K\alpha$  radiation ( $\lambda = 0.71073\ \text{\AA}$ ), equipped with an Atlas detector, with a step size and exposure time of  $0.3$  and  $60\ \text{s}$  respectively (Figure S1). The unit cell and crystal system (orthorhombic,  $a = 8.798(2)$ ,  $b = 20.865(4)$ ,  $c =$

34.551(6) Å) confirmed that the structure was still in the orthorhombic ambient pressure and temperature phase. Refinements were carried out against  $|F|^2$  using all data in CRYSTALS<sup>2</sup> starting from the ambient temperature and pressure coordinates previously determined (see above).

For the crystal collected at ambient pressure and temperature, single-crystal X-ray diffraction data were collected on a Bruker APEXII diffractometer (Bruker, 2002) with graphite-monochromated Mo  $K\alpha$  radiation ( $\lambda = 0.71073$  Å). These data were integrated using the programme SAINT<sup>3</sup>, while the absorption corrections were carried out with the program SADABS<sup>4</sup>. Refinements were carried out against  $|F|^2$  using all data in CRYSTALS. Pore volume and water content were calculated using the SQUEEZE algorithm within PLATON<sup>5</sup>.

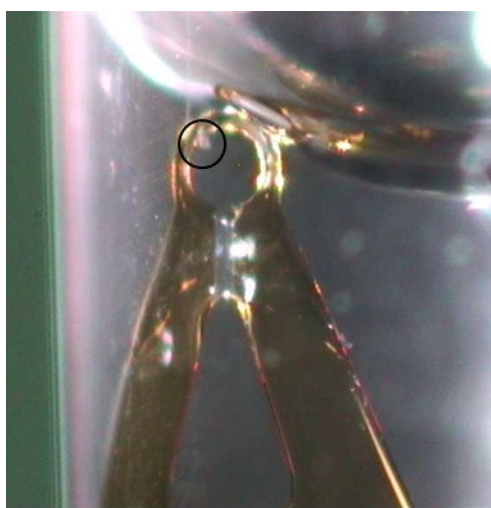

**Figure S1.** A single crystal fragment of Sc<sub>2</sub>BDC<sub>3</sub> mounted on a MiTeGen 100 µm Microloop™ using Araldite™ epoxy resin. The crystal is circled in black.

#### *High-pressure data collection and refinement*

The high-pressure experiment was carried out using a modified Merrill-Bassett diamond anvil cell (DAC) equipped with 600 µm culet diamonds and a tungsten gasket.<sup>6</sup> A crystal of Sc<sub>2</sub>BDC<sub>3</sub> and a chip of ruby (as a pressure calibrant) were loaded into the DAC with the CO<sub>2</sub>-loaded FC-77 as a hydrostatic medium. The ruby fluorescence method was used to measure the pressure.<sup>7</sup> High-pressure single-crystal X-ray diffraction data were collected on a Bruker APEXII diffractometer (Bruker, 2002) with graphite-monochromated Mo  $K\alpha$  radiation ( $\lambda =$

0.71073 Å) in  $\omega$ -scans in eight settings of  $2\theta$  and  $\phi$  with a frame time and step size of 40 seconds and  $0.5^\circ$  respectively. This data collection strategy was based on that described by Dawson *et al.*<sup>8</sup> The data were integrated with SAINT using 'dynamic masks' to avoid integration of regions of the detector shaded by the body of the pressure cell. Absorption corrections for the DAC and sample were carried out with the programs SHADE<sup>9</sup> and SADABS, respectively. Refinements were carried out as described above but against  $|F|^2$ , using atomic coordinates for the framework determined by Mowat *et al.*<sup>10</sup> The pore content was calculated using the SQUEEZE algorithm within the program *PLATON*. Because of the low completeness of the data sets, all 1,2 and 1,3 distances on the BDC linkers were restrained to the values observed from our previous ambient temperature and pressure structure. Only the Sc atoms were refined anisotropically. All other non-hydrogen atoms were refined with isotropic thermal parameters. All metal-ligand distances and torsion angles were refined freely. Thermal and vibrational similarity restraints were applied to the organic linkers. H-atoms attached to carbon were placed geometrically and not refined.

## References

- 1 Miller, S. R. *et al.* Single Crystal X-ray Diffraction Studies of Carbon Dioxide and Fuel-Related Gases Adsorbed on the Small Pore Scandium Terephthalate Metal Organic Framework, Sc-2(O<sub>2</sub>CC<sub>6</sub>H<sub>4</sub>CO<sub>2</sub>)(3). *Langmuir* **25**, 3618-3626, doi:10.1021/la803788u (2009).
- 2 Betteridge, P. W., Carruthers, J. R., Cooper, R. I., Prout, K. & Watkin, D. J. CRYSTALS version 12: software for guided crystal structure analysis. *Journal of Applied Crystallography* **36**, 1487 (2003).
- 3 SAINT version 7 (Bruker-AXS, Madison, Wisconsin, USA, 2006).
- 4 Sheldrick, G. M. SADABS Version 2008-1. *SADABS Version 2008-1* (2008).
- 5 PLATON- A multipurpose Crystallographic Tool (Utrecht University, Utrecht, The Netherlands, 2004).
- 6 Moggach, S. A., Allan, D. R., Parsons, S. & Warren, J. E. Incorporation of a new design of backing seat and anvil in a Merrill-Bassett diamond anvil cell. *J. Appl. Crystallogr.* **41**, 249-251 (2008).
- 7 Piermarini, G. J., Block, S., Barnett, J. D. & Forman, R. A. Calibration of the pressure dependence of the R1 ruby fluorescence line to 195 kbar. *J. Appl. Physics* **46**, 2774-2780 (1975).
- 8 Dawson, A., Allan, D. R., Parsons, S. & Ruf, M. Use of a CCD diffractometer in crystal structure determinations at high pressure. *J. Appl. Crystallogr.* **37**, 410-416 (2004).
- 9 SHADE (The University of Edinburgh, Edinburgh, United Kingdom, 2004).
- 10 Mowat, J. P. S. *et al.* Structural Chemistry, Monoclinic-to-Orthorhombic Phase Transition, and CO<sub>2</sub> Adsorption Behavior of the Small Pore Scandium Terephthalate, Sc-2(O<sub>2</sub>CC<sub>6</sub>H<sub>4</sub>CO<sub>2</sub>)(3), and Its Nitro- And Amino-Functionalized Derivatives. *Inorganic Chemistry* **50**, 10844-10858, doi:10.1021/ic201387d (2011).
